# Supplementary material
Source: publisher figshare collection journal article supplement (https://frontiersin.figshare.com/ndownloader/files/26178566)
Supplement: Supplementary file [file 26178566]

Table 3  
*Overview of hypotheses and findings*

|   | hypothesis                                                                     | previous findings                                                                                                                    | current study findings                                                                                                                                                                                                         |                        |
|---|--------------------------------------------------------------------------------|--------------------------------------------------------------------------------------------------------------------------------------|--------------------------------------------------------------------------------------------------------------------------------------------------------------------------------------------------------------------------------|------------------------|
| 1 | Replication of factor structure                                                | factor structure of correlated, but separable subscales found in middle childhood (Strauss et al., 2020)                             | three positively correlated, yet distinct subscales for self- and parent-ratings                                                                                                                                               | H1 supported           |
| 2 | Contrasting patterns of mean-level values in self- and parent-ratings          | mean values highest for JS-V and lowest for JS-P when using self-reports, opposite pattern for parent-reports (Strauss et al., 2020) | children reported lowest mean values for JS-V and highest for JS-P, the opposite pattern emerged for parent-ratings                                                                                                            | H2 supported           |
| 3 | negative relations between JS-V and prosocial behavior                         | negative links between JS-V and prosocial behavior in middle childhood (Strauss et al., 2020)                                        | parent-reported JS-V was negatively related with parent-rated prosocial behavior                                                                                                                                               | H3 supported           |
| 4 | prediction of prosocial behavior by JS-O and JS-P                              | parent-rated JS-O and JS-P predicted more prosocial behavior (Strauss et al., 2020)                                                  | JS-O and JS-P predicted more prosocial behavior (using parent-ratings)                                                                                                                                                         | H4 supported           |
| 5 | similar correlation patterns with social skills in parent- and teacher-ratings | all JS perspectives positively related to empathy and ToM (using parent-ratings; Strauss et al., 2020)                               | JS-V, JS-O and JS-P positively related to empathy and ToM; patterns for teacher-ratings similar to but less pronounced than parent-ratings                                                                                     | H5 supported           |
| 6 | similar re-test reliabilities (compared to previous research)                  | not yet tested in middle childhood; .43-.46 in previous research in adolescents (Bondü & Elsner, 2015)                               | re-test reliabilities between $r_{tt}=.510$ and $.593$ for parent-reports                                                                                                                                                      | H6 supported           |
| 7 | increases in JS-O and JS-P with age                                            | increases in JS-V and minor changes in JS-O and JS-P during adolescence (Bondü & Elsner, 2015)                                       | significant positive correlation between JS-P/JS-O and age; significant trend towards higher JS-O and JS-P with age (Jonckheere-Terpstra tests using self- and parent-reports)                                                 | H7 supported           |
| 8 | longitudinal associations between JS and prosocial/aggressive behavior         | not yet examined in middle childhood                                                                                                 | JS-V predicted less prosocial and more aggressive behavior; JS-O and JS-P predicted more prosocial behavior; JS-P predicted less aggressive behavior (only when stability of prosocial and aggressive behavior not considered) | H8 partially supported |
| 9 | weak MI between self- and parent-ratings                                       | strict MI between self- and parent-ratings (Strauss et al., 2020)                                                                    | inspections of fit indices indicated strong MI between self- and parent-ratings                                                                                                                                                | H9 rejected            |
